# Supplementary material for: Aggregation tailored emission of a benzothiazole based derivative: photostable turn on bioimaging
Source: Royal Society of Chemistry journal article supplement (doi:10.1039/c9ra08149f), 2019-01-01
Supplement: c9ra08149f1.pdf [file c9ra08149f1.pdf]

## Electronic Supporting Information (ESI)

# **Aggregation Tailored Emission of HBT Derivative: A Photostable *turn on* Bioimaging**

Ishpreet Kaur,<sup>a</sup> Vinay Sharma,<sup>b, c</sup> Shaikh M. Mobin,<sup>b, c, d</sup> Anjali Khajuria,<sup>e</sup> Puja Ohri,<sup>e</sup> Paramjit  
Kaur,<sup>a\*</sup> and Kamaljit Singh<sup>a\*</sup>

<sup>a</sup>Department of Chemistry, UGC-Centre of Advanced Study Guru Nanak Dev University,  
Amritsar 143005, India

<sup>b</sup>Discipline of Biosciences and Bio-Medical Engineering, <sup>c</sup>Discipline of Chemistry, <sup>d</sup>Discipline  
of Metallurgy Engineering and Materials Science, Indian Institute of Technology Indore, Simrol,  
Khandwa Road, Indore 453552, India

<sup>e</sup>Department of Zoology, Guru Nanak Dev University, Amritsar 143005, India

E-mail: [paramjit19in@yahoo.co.in](mailto:paramjit19in@yahoo.co.in); [kamaljit.chem@gndu.ac.in](mailto:kamaljit.chem@gndu.ac.in)

### **Table of content**

|                                                                                          |              |
|------------------------------------------------------------------------------------------|--------------|
| <b>Compound characterization: NMR, EI Mass and FTIR Spectra .....</b>                    | <b>S2-S4</b> |
| <b>DFT-TD-DFT calculation data: Cartesian coordinates of 3 in THF and<br/>water.....</b> | <b>S4-S9</b> |
| <b>Reference.....</b>                                                                    | <b>S10</b>   |

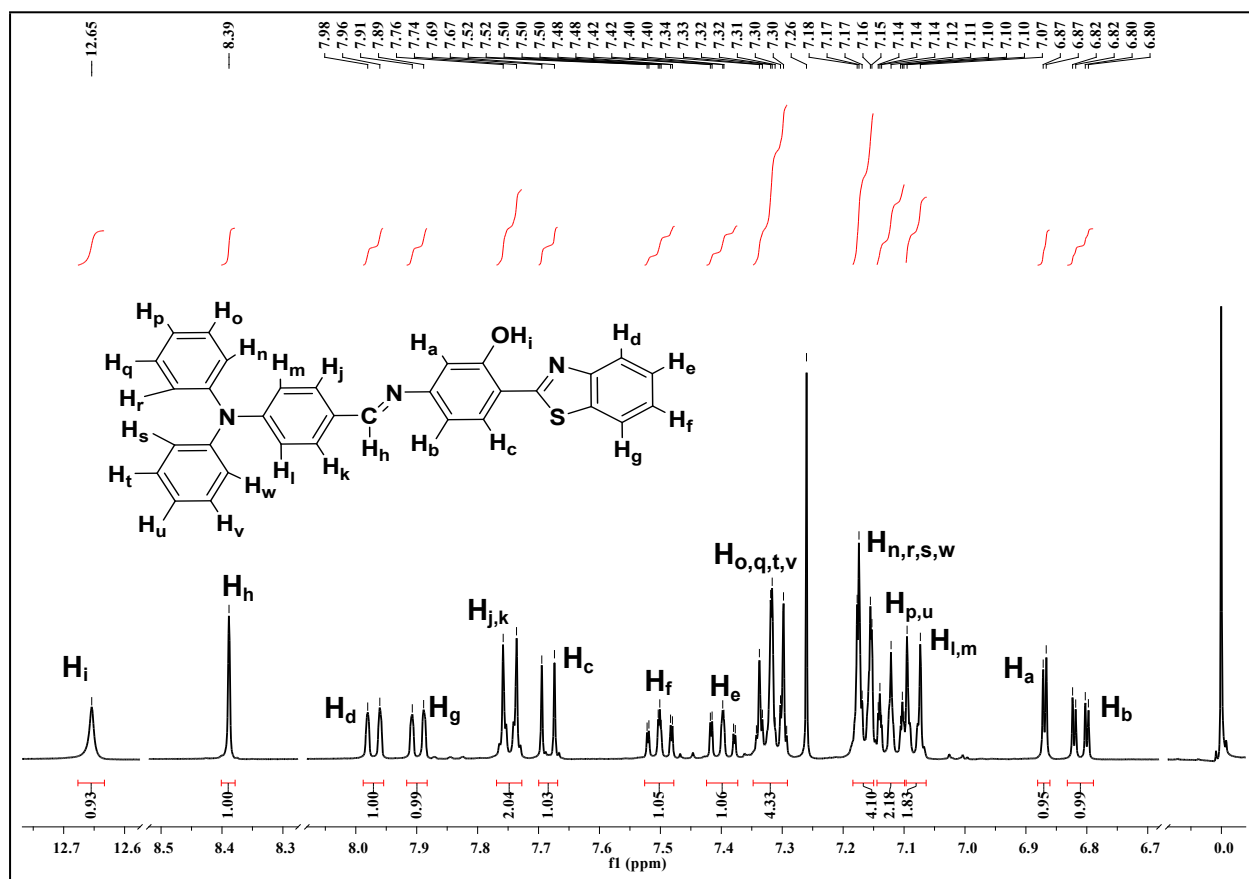

**Fig.S1:**  $^1\text{H}$  NMR ( $\text{CDCl}_3$ ) spectrum of **3**.

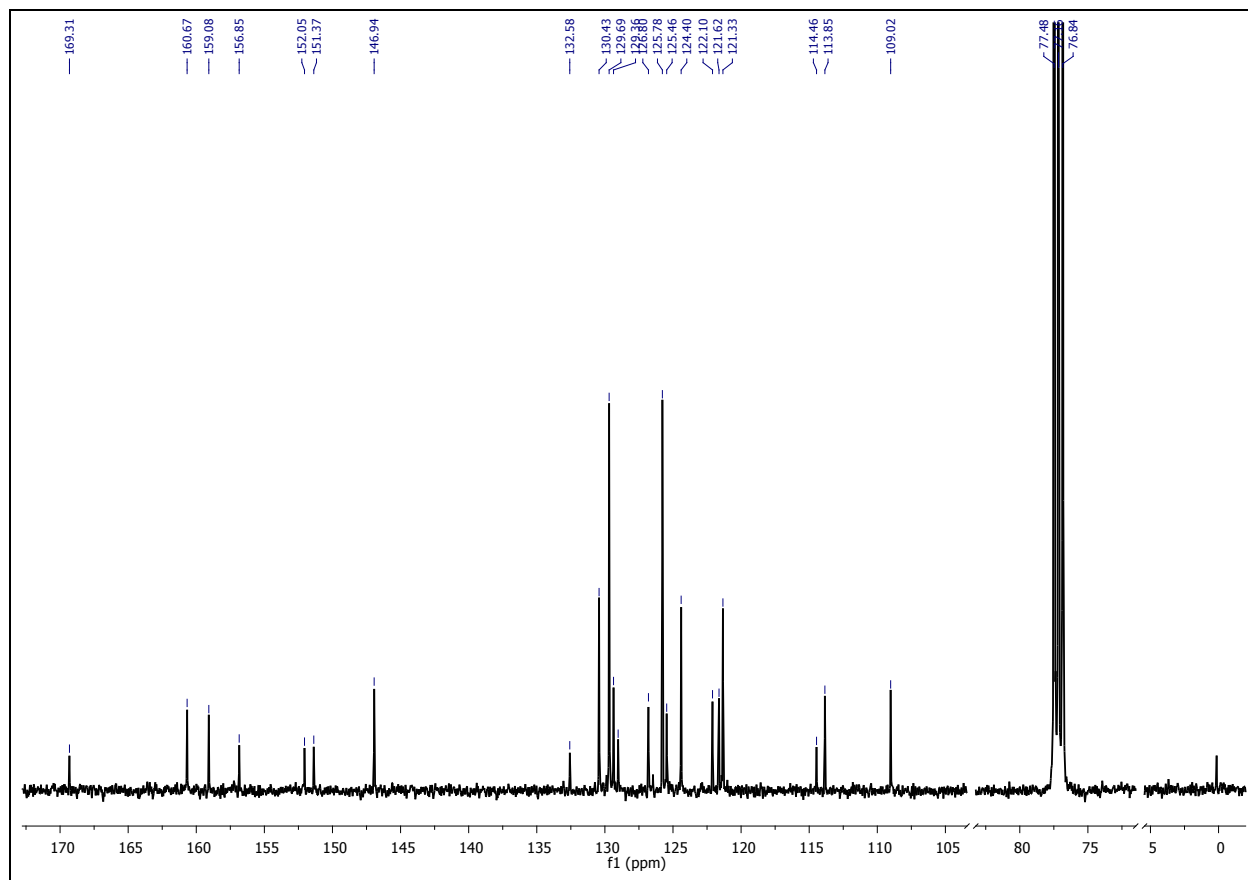

**Fig.S2:**  $^{13}\text{C}$  NMR ( $\text{CDCl}_3$ ) spectrum of **3**.

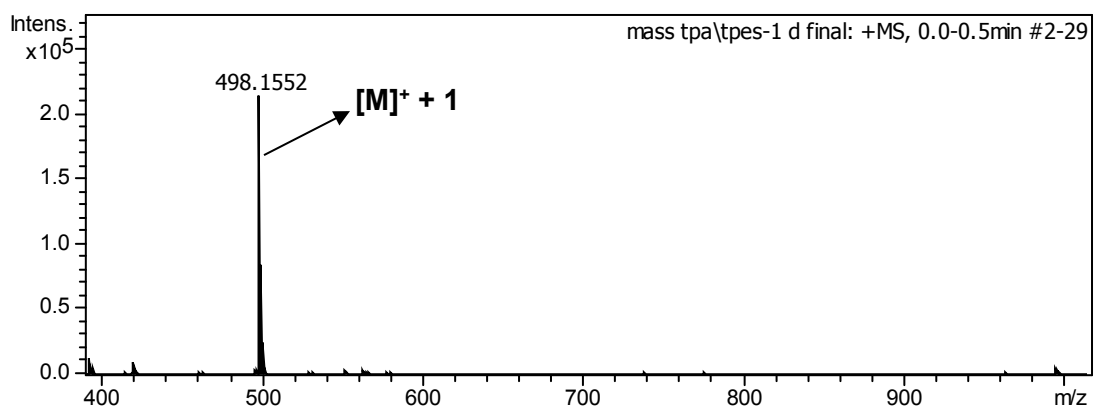

**Fig.S3:** EI Mass Spectrum of **3**.

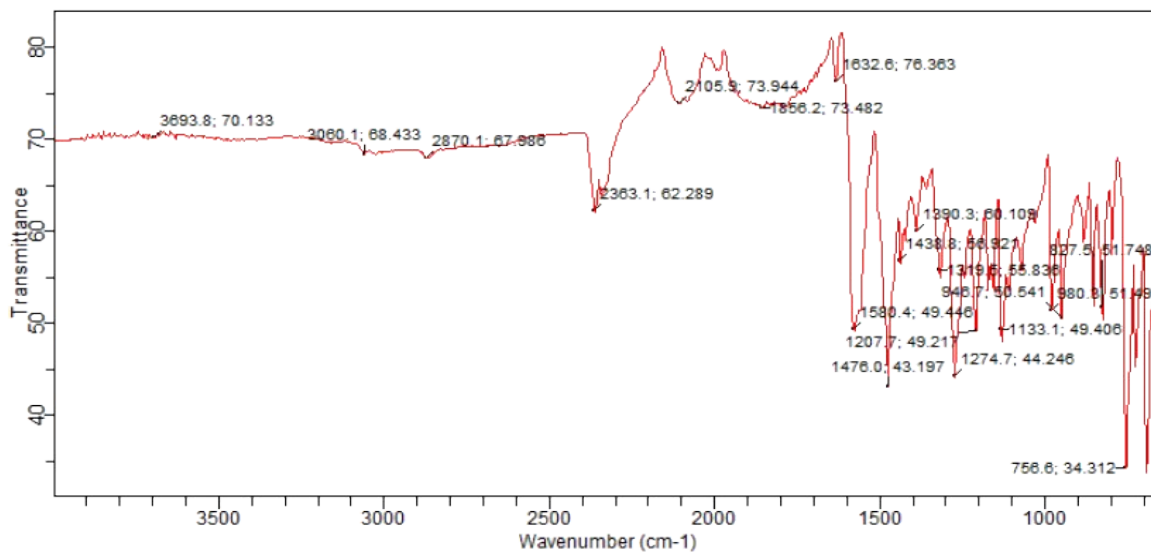

**Fig.S4:** FTIR spectrum of **3**.

**Table S1:** Cartesian coordinates of **3** (THF).

| Center Number | Atomic Number | Atomic Type | Coordinates (Angstroms) |          |           |
|---------------|---------------|-------------|-------------------------|----------|-----------|
|               |               |             | X                       | Y        | Z         |
| 1             | C             | 0           | -7.599359               | 1.914751 | 1.126541  |
| 2             | C             | 0           | -6.701392               | 1.271827 | 0.268719  |
| 3             | C             | 0           | -6.298340               | 1.873275 | -0.905155 |
| 4             | C             | 0           | -6.787316               | 3.128774 | -1.269173 |
| 5             | C             | 0           | -7.701237               | 3.785404 | -0.422687 |
| 6             | C             | 0           | -8.105841               | 3.177631 | 0.775183  |
| 7             | H             | 0           | -7.892015               | 1.428451 | 2.046738  |
| 8             | H             | 0           | -5.584591               | 1.321864 | -1.503234 |
| 9             | H             | 0           | -6.465173               | 3.591555 | -2.192665 |

|    |   |   |           |           |           |
|----|---|---|-----------|-----------|-----------|
| 10 | H | 0 | -8.085827 | 4.760550  | -0.692052 |
| 11 | H | 0 | -8.800866 | 3.682595  | 1.433294  |
| 12 | N | 0 | -6.089516 | -0.030708 | 0.538631  |
| 13 | C | 0 | -4.623497 | -0.098228 | 0.562304  |
| 14 | C | 0 | -3.864940 | -0.725993 | -0.462573 |
| 15 | C | 0 | -3.947723 | 0.504423  | 1.634411  |
| 16 | C | 0 | -2.472352 | -0.748482 | -0.402164 |
| 17 | H | 0 | -4.375481 | -1.187210 | -1.289701 |
| 18 | C | 0 | -2.551946 | 0.488276  | 1.688694  |
| 19 | H | 0 | -4.520674 | 0.976946  | 2.420514  |
| 20 | C | 0 | -1.798568 | -0.139857 | 0.680577  |
| 21 | H | 0 | -1.895991 | -1.221635 | -1.185504 |
| 22 | H | 0 | -2.033195 | 0.947539  | 2.518858  |
| 23 | C | 0 | -6.990685 | -1.054197 | -0.008444 |
| 24 | C | 0 | -6.891988 | -2.336658 | 0.573424  |
| 25 | C | 0 | -7.972371 | -0.866126 | -1.057148 |
| 26 | C | 0 | -7.711063 | -3.386238 | 0.151578  |
| 27 | H | 0 | -6.179352 | -2.497537 | 1.370138  |
| 28 | C | 0 | -8.789287 | -1.934675 | -1.447498 |
| 29 | H | 0 | -8.088507 | 0.098929  | -1.594037 |
| 30 | C | 0 | -8.667888 | -3.194404 | -0.852403 |
| 31 | H | 0 | -7.614428 | -4.354996 | 0.624276  |
| 32 | H | 0 | -9.514683 | -1.781762 | -2.236274 |

|    |   |   |           |           |           |
|----|---|---|-----------|-----------|-----------|
| 33 | H | 0 | -9.300819 | -4.013314 | -1.167881 |
| 34 | C | 0 | -0.326948 | -0.147763 | 0.759683  |
| 35 | N | 0 | 0.710646  | -0.706350 | -0.023036 |
| 36 | C | 0 | 2.129256  | -0.517660 | 0.034132  |
| 37 | C | 0 | 2.995006  | -1.602285 | -0.185773 |
| 38 | C | 0 | 2.651783  | 0.796265  | 0.214795  |
| 39 | C | 0 | 4.372161  | -1.403618 | -0.167977 |
| 40 | H | 0 | 2.602134  | -2.589170 | -0.367746 |
| 41 | C | 0 | 4.027575  | 0.985355  | 0.194829  |
| 42 | H | 0 | 1.976227  | 1.626871  | 0.365854  |
| 43 | C | 0 | 4.911250  | -0.109996 | 0.028372  |
| 44 | H | 0 | 4.441877  | 1.973445  | 0.341078  |
| 45 | C | 0 | 8.597597  | -0.404808 | 0.250829  |
| 46 | C | 0 | 8.800530  | 0.919949  | -0.385346 |
| 47 | C | 0 | 10.079297 | 1.432524  | -0.614124 |
| 48 | C | 0 | 11.176263 | 0.668909  | -0.229962 |
| 49 | C | 0 | 11.013601 | -0.592911 | 0.375571  |
| 50 | C | 0 | 9.751589  | -1.129767 | 0.615234  |
| 51 | C | 0 | 6.386572  | 0.056664  | 0.001205  |
| 52 | H | 0 | 10.221630 | 2.399815  | -1.078889 |
| 53 | H | 0 | 12.172431 | 1.053275  | -0.403072 |
| 54 | H | 0 | 11.891176 | -1.158175 | 0.657443  |
| 55 | H | 0 | 9.636137  | -2.098681 | 1.080676  |

|    |   |   |          |           |           |
|----|---|---|----------|-----------|-----------|
| 56 | N | 0 | 7.276207 | -0.788788 | 0.454524  |
| 57 | S | 0 | 7.153324 | 1.658032  | -0.800677 |
| 58 | O | 0 | 5.135558 | -2.512650 | -0.287314 |
| 59 | H | 0 | 6.052563 | -2.367919 | 0.016780  |

-----

**Table S2:** Cartesian coordinates of **3** (H<sub>2</sub>O).

| Center<br>Number | Atomic<br>Number | Atomic<br>Type | Coordinates (Angstroms) |           |           |
|------------------|------------------|----------------|-------------------------|-----------|-----------|
|                  |                  |                | X                       | Y         | Z         |
| 1                | C                | 0              | 7.865866                | -1.372412 | 0.754628  |
| 2                | C                | 0              | 6.789995                | -1.179858 | -0.128684 |
| 3                | C                | 0              | 6.562752                | -2.109140 | -1.159051 |
| 4                | C                | 0              | 7.396492                | -3.223947 | -1.291645 |
| 5                | C                | 0              | 8.471624                | -3.414117 | -0.413151 |
| 6                | C                | 0              | 8.704248                | -2.481727 | 0.606390  |
| 7                | H                | 0              | 8.039859                | -0.656396 | 1.550160  |
| 8                | H                | 0              | 5.741303                | -1.954388 | -1.849773 |
| 9                | H                | 0              | 7.213576                | -3.935562 | -2.090190 |
| 10               | H                | 0              | 9.120519                | -4.276474 | -0.523253 |
| 11               | H                | 0              | 9.532258                | -2.621553 | 1.293681  |
| 12               | N                | 0              | 5.948641                | -0.021568 | 0.009842  |
| 13               | C                | 0              | 4.546720                | -0.138562 | 0.030114  |
| 14               | C                | 0              | 3.725590                | 0.946015  | -0.371961 |

|    |   |   |           |           |           |
|----|---|---|-----------|-----------|-----------|
| 15 | C | 0 | 3.921745  | -1.336719 | 0.451055  |
| 16 | C | 0 | 2.343925  | 0.835421  | -0.345953 |
| 17 | H | 0 | 4.183838  | 1.866193  | -0.712445 |
| 18 | C | 0 | 2.536536  | -1.441008 | 0.470937  |
| 19 | H | 0 | 4.527681  | -2.174466 | 0.771727  |
| 20 | C | 0 | 1.713867  | -0.362125 | 0.078030  |
| 21 | H | 0 | 1.727112  | 1.668900  | -0.664500 |
| 22 | H | 0 | 2.070526  | -2.361352 | 0.807098  |
| 23 | C | 0 | 6.585215  | 1.261712  | 0.143925  |
| 24 | C | 0 | 6.232840  | 2.125525  | 1.195695  |
| 25 | C | 0 | 7.584935  | 1.646504  | -0.765408 |
| 26 | C | 0 | 6.865266  | 3.366101  | 1.323706  |
| 27 | H | 0 | 5.472011  | 1.823148  | 1.906774  |
| 28 | C | 0 | 8.223707  | 2.882345  | -0.621935 |
| 29 | H | 0 | 7.854817  | 0.980041  | -1.577083 |
| 30 | C | 0 | 7.864461  | 3.748858  | 0.418901  |
| 31 | H | 0 | 6.586724  | 4.026178  | 2.138704  |
| 32 | H | 0 | 8.994229  | 3.171153  | -1.329325 |
| 33 | H | 0 | 8.358139  | 4.709018  | 0.524967  |
| 34 | C | 0 | 0.279618  | -0.503692 | 0.121587  |
| 35 | N | 0 | -0.639654 | 0.317993  | -0.170593 |
| 36 | C | 0 | -2.033702 | 0.143994  | -0.102754 |
| 37 | C | 0 | -2.837378 | 1.219769  | -0.494752 |
| 38 | C | 0 | -2.634786 | -1.058909 | 0.343459  |



|    |   |   |            |           |           |
|----|---|---|------------|-----------|-----------|
| 39 | C | 0 | -4.231637  | 1.119997  | -0.449322 |
| 40 | H | 0 | -2.382946  | 2.140969  | -0.836654 |
| 41 | C | 0 | -4.014685  | -1.158699 | 0.389466  |
| 42 | H | 0 | -2.004359  | -1.886809 | 0.644466  |
| 43 | C | 0 | -4.849789  | -0.085646 | 0.000268  |
| 44 | H | 0 | -4.466860  | -2.083407 | 0.733156  |
| 45 | C | 0 | -8.448931  | 0.533646  | -0.193974 |
| 46 | C | 0 | -8.743775  | -0.761576 | 0.292821  |
| 47 | C | 0 | -10.057193 | -1.194512 | 0.468589  |
| 48 | C | 0 | -11.090297 | -0.305353 | 0.147547  |
| 49 | C | 0 | -10.809615 | 0.986414  | -0.337782 |
| 50 | C | 0 | -9.493432  | 1.415176  | -0.512010 |
| 51 | C | 0 | -6.291148  | -0.166130 | 0.043696  |
| 52 | H | 0 | -10.277900 | -2.187542 | 0.841851  |
| 53 | H | 0 | -12.120253 | -0.619702 | 0.275963  |
| 54 | H | 0 | -11.627374 | 1.656401  | -0.579128 |
| 55 | H | 0 | -9.264729  | 2.406885  | -0.884720 |
| 56 | N | 0 | -7.086309  | 0.820014  | -0.315663 |
| 57 | S | 0 | -7.200221  | -1.671961 | 0.615995  |
| 58 | O | 0 | -4.969116  | 2.204714  | -0.845039 |
| 59 | H | 0 | -5.954667  | 1.983288  | -0.756796 |

-----

## Reference:

1. M.J. Frisch, G.W. Trucks, H.B. Schlegel, G.E. Scuseria, M.A. Robb, J.R. Cheeseman, G. Scalmani, V. Barone, B. Mennucci, G.A. Petersson, H. Nakatsuji, M. Caricato, X. Li, H.P. Hratchian, A.F. Izmaylov, J. Bloino, G. Zheng, J.L. Sonnenberg, M. Hada, M. Ehara, K. Toyota, R. Fukuda, J. Hasegawa, M. Ishida, T. Nakajima, Y. Honda, O. Kitao, H. Nakai, T. Vreven, J.A. Montgomery, Jr., J.E. Peralta, F. Ogliaro, M. Bearpark, J. J. Heyd, E. Brothers, K.N. Kudin, V.N. Staroverov, T. Keith, R. Kobayashi, J. Normand, K. Raghavachari, A. Rendell, J.C. Burant, S.S. Iyengar, J. Tomasi, M. Cossi, N. Rega, J. M. Millam, M. Klene, J.E. Knox, J.B. Cross, V. Bakken, C. Adamo, J. Jaramillo, R. Gomperts, R.E. Stratmann, O. Yazyev, A.J. Austin, R. Cammi, C. Pomelli, J.W. Ochterski, R.L. Martin, K. Morokuma, V.G. Zakrzewski, G.A. Voth, P. Salvador, J.J. Dannenberg, S. Dapprich, A.D. Daniels, O. Farkas, J.B. Foresman, J.V. Ortiz, J. Cioslowski, D.J. Fox, Gaussian 09, Revision B.01, Gaussian, Inc., Wallingford CT, 2010.
